# Supplementary material for: Targeting Intracellular Mycobacteria Using Nanosized Niosomes Loaded with Antibacterial Agents
Source: MDPI journal article supplement (doi:10.3390/nano11081984), 2021-08-01
Supplement: s1 [file s1]

## Supplementary Information

# Targeting Intracellular Mycobacteria Using Nanosized Niosomes Loaded with Antibacterial Agents

Yael Nicole Slavin <sup>1</sup>, Kristina Ivanova <sup>2</sup>, Wei-lun Tang <sup>3</sup>, Tzanko Tzanov <sup>2</sup>, Shyh-dar Li <sup>3</sup> and Horacio Bach <sup>1,\*</sup>

<sup>1</sup> Division of Infectious Diseases, Faculty of Medicine, The University of British Columbia, Vancouver, BC V6H 3Z6, Canada; yaenicoleslavin@gmail.com

<sup>2</sup> Grup de Biotecnologia Molecular i Industrial, Department of Chemical Engineering, Universitat Politècnica de Catalunya, 08222 Terrassa, Spain; kristina.ivanova@upc.edu (K.I.); tzanko.tzanov@upc.edu (T.T.)

<sup>3</sup> Faculty of Pharmaceutical Sciences, The University of British Columbia, Vancouver, BC V6T 1Z3, Canada; weiluntang1216@gmail.com (W.-l.T.); shyh-dar.li@ubc.ca (S.-d.L.)

\* Correspondence: hbach@mail.ubc.ca; Tel.: +1-604-875-4111

(A)

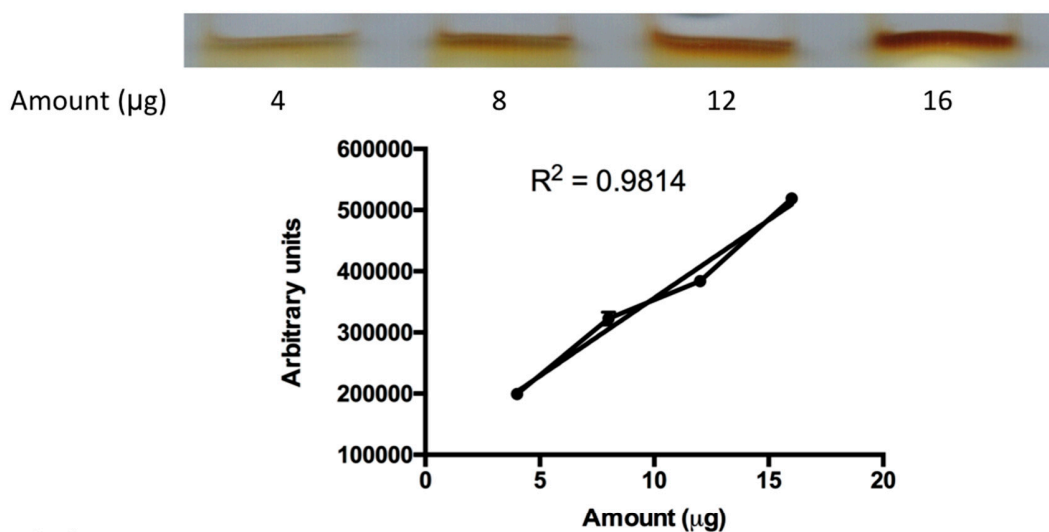

(B)

L-AgNP niosome

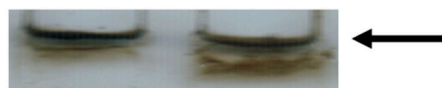

Acetonitrile (1:1)

- +

**Figure S1.** The concentration of L-AgNPs loaded in the nanoniosomes was calculated after disruption with acetonitrile (1:1). **(A)** A calibration curve of the L-AgNPs was determined in a 4% SDS-PAGE after loading known concentrations of the L-AgNP, and the values were calculated by densitometry. **(B)** The final concentration of the L-AgNPs in the nanoniosome was determined after lysis, as indicated earlier. The black arrow points to the released L-AgNPs.
